# Supplementary material for: Mn2 Dimers Encapsulated in Silicon Cages: A Complex Challenge to MC-SCF Theory
Source: MDPI journal article supplement (doi:10.3390/molecules27217544), 2022-11-03
Supplement: s1 [file s1]

## Supporting information

### Mn<sub>2</sub> dimers encapsulated in silicon cages: a complex challenge to MC-SCF theory

Vaibhav Khanna and John E. McGrady

Department of Chemistry, University of Oxford, Oxford,  
OX1 3QZ, United Kingdom

### Functional dependence of Mn-Mn bond lengths in Mn<sub>2</sub>Si<sub>10</sub>, Mn<sub>2</sub>Si<sub>12</sub> and [Mn<sub>2</sub>Si<sub>13</sub>]<sup>+</sup>

In order to explore the functional dependence of geometry, and in particular the Mn-Mn bond length, we have re-optimised the geometries using hybrid functionals (B3LYP, PBE0), a metaGGA (SCAN) and a metahybrid (TPSSH).

**Table S1** Optimized Mn-Mn bond lengths (in Angstrom) in Mn<sub>2</sub>Si<sub>10</sub>, Mn<sub>2</sub>Si<sub>12</sub> and [Mn<sub>2</sub>Si<sub>13</sub>]<sup>+</sup> using the PBE, SCAN, B3LYP, PBE0 and TPSSH functionals.

|                                                  | PBE  | SCAN | B3LYP | PBE0 | TPSSH |
|--------------------------------------------------|------|------|-------|------|-------|
| Mn <sub>2</sub> Si <sub>10</sub>                 | 2.36 | 2.38 | 2.44  | 2.42 | 2.37  |
| Mn <sub>2</sub> Si <sub>12</sub>                 | 2.26 | 2.28 | 2.40  | 2.41 | 2.27  |
| [Mn <sub>2</sub> Si <sub>13</sub> ] <sup>+</sup> | 2.35 | 2.36 | 2.44  | 2.42 | 2.36  |

**Cartesian coordinates used in RAS/GAS calculations on  $\text{Mn}_2\text{Si}_{10}$ ,  $\text{Mn}_2\text{Si}_{12}$  and  $[\text{Mn}_2\text{Si}_{13}]^+$  (optimized with the PBE functional)**

**$\text{Mn}_2\text{Si}_{10}$**

|    |             |             |             |
|----|-------------|-------------|-------------|
| Mn | 0.11795933  | -0.11381712 | -0.00000000 |
| Mn | 2.46729237  | 0.13738000  | -0.00000000 |
| Si | -1.07737015 | 0.58436286  | 2.03365367  |
| Si | 1.06641812  | 1.55021925  | 1.37903040  |
| Si | -0.99480515 | -1.79119004 | 1.26655830  |
| Si | -1.07737015 | 0.58436286  | -2.03365367 |
| Si | -0.99480515 | -1.79119004 | -1.26655830 |
| Si | 1.40583470  | -1.42508757 | 1.43245794  |
| Si | -1.00444419 | 2.10847172  | -0.00000000 |
| Si | 1.06641812  | 1.55021925  | -1.37903040 |
| Si | 1.40583470  | -1.42508757 | -1.43245794 |
| Si | -2.38096254 | 0.03135638  | -0.00000000 |

**$\text{Mn}_2\text{Si}_{12}$**

|    |             |             |             |
|----|-------------|-------------|-------------|
| Mn | 0.00000000  | 0.00000000  | -0.40922965 |
| Mn | 0.00000000  | 0.00000000  | 1.84690040  |
| Si | 2.10442167  | -1.21498842 | -1.37422324 |
| Si | 2.10442167  | 1.21498842  | -1.37422324 |
| Si | 0.00000000  | -2.42997684 | -1.37422324 |
| Si | 0.00000000  | 2.42997684  | -1.37422324 |
| Si | -2.10442167 | -1.21498842 | -1.37422324 |
| Si | -2.10442167 | 1.21498842  | -1.37422324 |
| Si | 2.41883792  | 0.00000000  | 0.87072311  |
| Si | 1.20941896  | 2.09477509  | 0.87072311  |
| Si | 1.20941896  | -2.09477509 | 0.87072311  |
| Si | -1.20941896 | 2.09477509  | 0.87072311  |
| Si | -1.20941896 | -2.09477509 | 0.87072311  |
| Si | -2.41883792 | 0.00000000  | 0.87072311  |

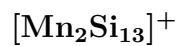

|    |              |              |              |
|----|--------------|--------------|--------------|
| Mn | 0.000000000  | 0.000000000  | 0.380000000  |
| Mn | 0.000000000  | 0.000000000  | -1.972152290 |
| Si | 2.048763690  | -1.182854270 | -0.823965660 |
| Si | 2.048763690  | 1.182854270  | -0.823965660 |
| Si | 0.000000000  | -2.365708530 | -0.823965660 |
| Si | 0.000000000  | 2.365708530  | -0.823965660 |
| Si | -2.048763690 | -1.182854270 | -0.823965660 |
| Si | -2.048763690 | 1.182854270  | -0.823965660 |
| Si | 2.446465770  | 0.000000000  | 1.344989400  |
| Si | 1.223232880  | 2.118701500  | 1.344989400  |
| Si | 1.223232880  | -2.118701500 | 1.344989400  |
| Si | -1.223232880 | 2.118701500  | 1.344989400  |
| Si | -1.223232880 | -2.118701500 | 1.344989400  |
| Si | -2.446465770 | 0.000000000  | 1.344989400  |
| Si | 0.000000000  | 0.000000000  | 2.651539260  |
